# Supplementary material for: Epigenetic Alteration of the Cancer-Related Gene TGFBI in B Cells Infected with Epstein–Barr Virus and Exposed to Aflatoxin B1: Potential Role in Burkitt Lymphoma Development
Source: MDPI journal article supplement (doi:10.3390/cancers14051284), 2022-03-02
Supplement: s1 [file s1]

# Epigenetic Alteration of the Cancer-Related Gene TGFBI in B cells Infected with Epstein–Barr Virus and Exposed to Aflatoxin B1: Potential Role in Burkitt Lymphoma Development

Francesca Manara, Antonin Jay, Grace Akinyi Odongo, Fabrice Mure, Mohamed Ali Maroui, Audrey Diederichs, Cecilia Sirand, Cyrille Cuenin, Massimo Granai, Lucia Mundo, Hector Hernandez-Vargas, Stefano Lazzi, Rita Khoueiry, Henri Gruffat, Zdenko Herceg and Rosita Accardi

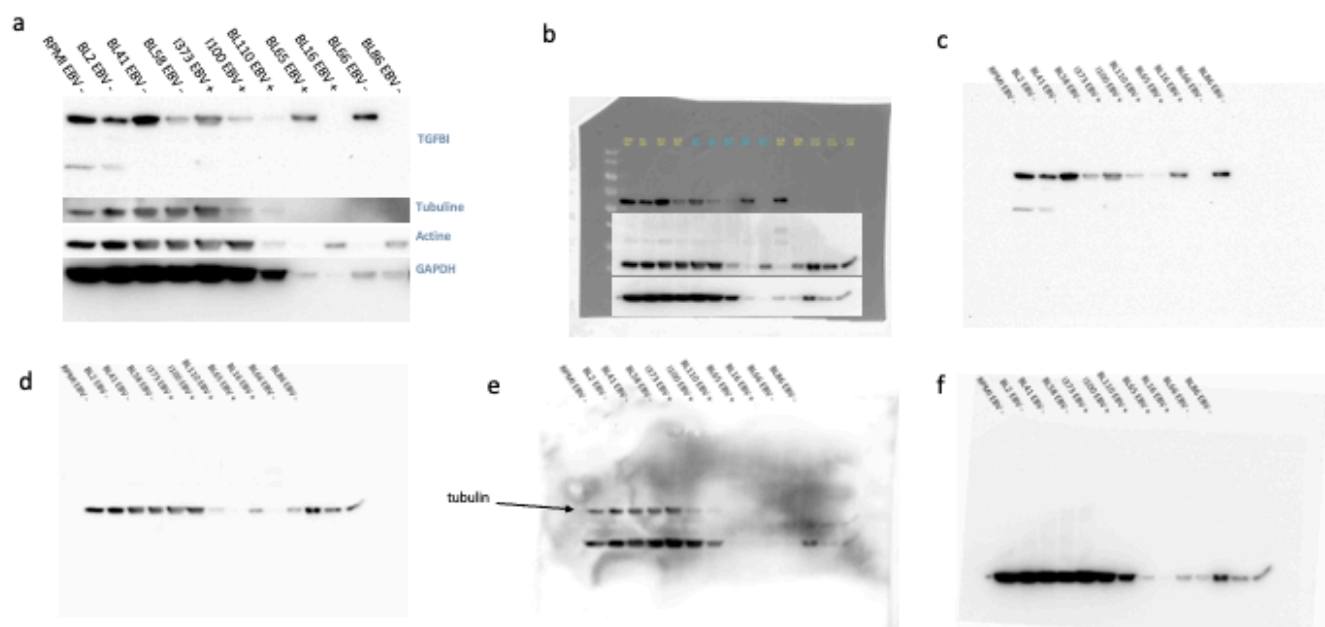

**Supplementary Figure**  
Western blot analysis of TGFBI protein expression in EBV(-) and EBV(+) BL cell lines (a). Overlap of the original membrane probed with the different antibodies (b). Original unedited blots indicating TGFBI (c), Actin (d), tubulin (e) and GAPDH (f) used for the western blot in Fig. 3C of the manuscript.

Manara et al.

**Figure S1.** Original Western Blot figure for Figure 3c.
